# Supplementary material for: β″-(ET)3(MnCl4)(1,1,2-C2H3Cl3) (ET = bis(ethylenedithio)tetrathiafulvalene); a pressure-sensitive new molecular conductor with localized spins
Source: Royal Society of Chemistry journal article supplement (doi:10.1039/b102786g), 2001-01-01
Supplement: b102786g.doc [file b102786g.doc]

Table S1 Intermolecular short distances in (ET)3(MnCl4)(TCE).*

| atoms involved | distances in Å |
| --- | --- |
| S(1)-S(5) | 3.468(6) |
| S(1)-S(7) | 3.594(7) |
| S(1)-S(12) | 3.651(8) |
| S(2)-S(9) | 3.346(6) |
| S(2)-S(11) | 3.439(7) |
| S(4)-S(6) | 3.661(7) |
| S(6)-S(10) | 3.567(7) |
| S(8)-S(10) | 3.476(7) |
| S(1)-H(10) | 2.947 |
| S(9)-H(7) | 3.095 |
| S(2)-C(5) | 3.57(2) |
| S(5)-C(15) | 3.57(2) |
| S(12)-C(6) | 3.58(2) |
| C(4)-C(4) | 3.44(3) |
| Cl(1)-S(9) | 3.582(7) |
| Cl(4)-S(8) | 3.647(7) |
| Cl(1)-H(3) | 2.857 |
| Cl(1)-H(9) | 2.908 |
| Cl(4)-H(11) | 3.085 |
| Cl(5)-H(12) | 2.942 |
| Cl(5)-H(1) | 3.103 |

* Note that van der Waals distances are as follows: S-S; 3.70, S-H; 3.15, S-C; 3.55, C-C; 3.40, Cl-S; 3.65 and Cl-H; 3.10 Å: the values are taken from F. A. Cotton, G. Wilkinson and P. L. Gaus, *Basic Inorganic Chemistry*, 3rd ed. 1995, John Wiley.

Table S2 Selected bond lengths and angles of MnCl4 species in (ET)3(MnCl4)(TCE).

| atoms involved | distances in Å / angles in degree |
| --- | --- |
| Mn(1)-Cl(1) | 2.367(6) |
| Mn(1)-Cl(2) | 2.345(8) |
| Mn(1)-Cl(3) | 2.364(9) |
| Cl(1)-Mn(1)-Cl(1) | 108.3(3) |
| Cl(1)-Mn(1)-Cl(2) | 113.8(2) |
| Cl(1)-Mn(1)-Cl(3) | 107.8(2) |
| Cl(2)-Mn(1)-Cl(3) | 105.0(3) |

Table S3 Selected Bond lengths and angles of ET molecules in (ET)3(MnCl4)(TCE).*

| ET molecule A | | ET molecule B | |
| --- | --- | --- | --- |
| atoms involved | distances in Å | atoms involved | distances in Å |
| S(1)-C(1)  S(2)-C(2)  S(7)-C(9)  S(8)-C(10) | 1.72(2)  1.73(2)  1.81(2)  1.76(2) | S(9)-C(11)  S(10)-C(12) | 1.82(2)  1.82(2) |
| S(3)-C(3)  S(4)-C(4)  S(5)-C(7)  S(6)-C(8) | 1.70(2)  1.70(2)  1.75(2)  1.76(2) | S(11)-C(13)  S(12)-C(14) | 1.74(2)  1.72(2) |
| S(5)-C(6)  S(6)-C(6)  S(3)-C(5)  S(4)-C(5) | 1.77(2)  1.70(2)  1.74(2)  1.70(2) | S(11)-C(15)  S(12)-C(15) | 1.74(2)  1.75(2) |
| S(7)-C(7)  S(8)-C(8)  S(1)-C(3)  S(2)-C(4) | 1.74(2)  1.71(2)  1.75(2)  1.76(2) | S(9)-C(13)  S(10)-C(14) | 1.71(2)  1.77(2) |
| C(3)-C(4)  C(7)-C(8) | 1.36(2)  1.37(2) | C(13)-C(14) | 1.36(2) |
| C(1)-C(2)  C(9)-C(10) | 1.38(3)  1.48(3) | C(11)-C(12) | 1.50(2) |
| C(5)-C(6) | 1.38(2) | C(15)-C(15) | 1.37(3) |

* The corresponding values are tabulated in the next but one blocks to each other. Note that one (B) of the ET molecules is on the inversion center and thus only half of it is crystallographically independent.

Table S3(continued) Selected Bond lengths and angles of ET molecules in (ET)3(MnCl4)(TCE).*

| ET molecule A | | ET molecule B | |
| --- | --- | --- | --- |
| atoms involved | angles in degree | atoms involved | angles in degree |
| C(1)-S(1)-C(3)  C(2)-S(2)-C(4)  C(7)-S(7)-C(9)  C(8)-S(8)-C(10) | 103(1)  98(1)  100(1)  102(1) | C(11)-S(9)-C(13)  C(12)-S(10)-C(14) | 104(1)  100.0(9) |
| C(3)-S(3)-C(5)  C(4)-S(4)-C(5)  C(6)-S(5)-C(7)  C(6)-S(6)-C(8) | 94.7(8)  94.4(8)  95.7(9)  97.3(8) | C(13)-S(11)-C(15)  C(14)-S(12)-C(15) | 96.8(8)  94.7(8) |
| S(1)-C(1)-C(2)  S(2)-C(2)-C(1)  S(7)-C(9)-C(10)  S(8)-C(10)-C(9) | 123(1)  124(1)  110(1)  121(1) | S(9)-C(11)-C(12)  S(10)-C(12)-C(11) | 115(1)  112(1) |
| S(1)-C(3)-C(4)  S(2)-C(4)-C(3)  S(8)-C(8)-C(7)  S(7)-C(7)-C(8) | 127(1)  124(1)  128(1)  127(1) | S(9)-C(13)-C(14)  S(10)-C(14)-C(13) | 129(1)  126(1) |
| S(3)-C(3)-C(4)  S(4)-C(4)-C(3)  S(5)-C(7)-C(8)  S(6)-C(8)-C(7) | 116(1)  118(1)  116(1)  115(1) | S(11)-C(13)-C(14)  S(12)-C(14)-C(13) | 114(1)  119(1) |
| S(1)-C(3)-S(3)  S(2)-C(4)-S(4)  S(5)-C(7)-S(7)  S(6)-C(8)-S(8) | 116(1)  117(1)  115(1)  115(1) | S(9)-C(13)-S(11)  S(10)-C(14)-S(12) | 115(1)  114(1) |
| S(3)-C(5)-S(4)  S(5)-C(6)-S(6) | 115(1)  114(1) | S(11)-C(15)-S(12) | 114.5(9) |

* The corresponding values are tabulated in the next but one blocks to each other. Note that one (B) of the ET molecules is on the inversion center and thus only half of it is crystallographically independent.
