# Supplementary material for: β″-(ET)3(MnCl4)(1,1,2-C2H3Cl3) (ET = bis(ethylenedithio)tetrathiafulvalene); a pressure-sensitive new molecular conductor with localized spins
Source: Royal Society of Chemistry journal article supplement (doi:10.1039/b102786g), 2001-01-01
Supplement: b102786g.pdf [file b102786g.pdf]

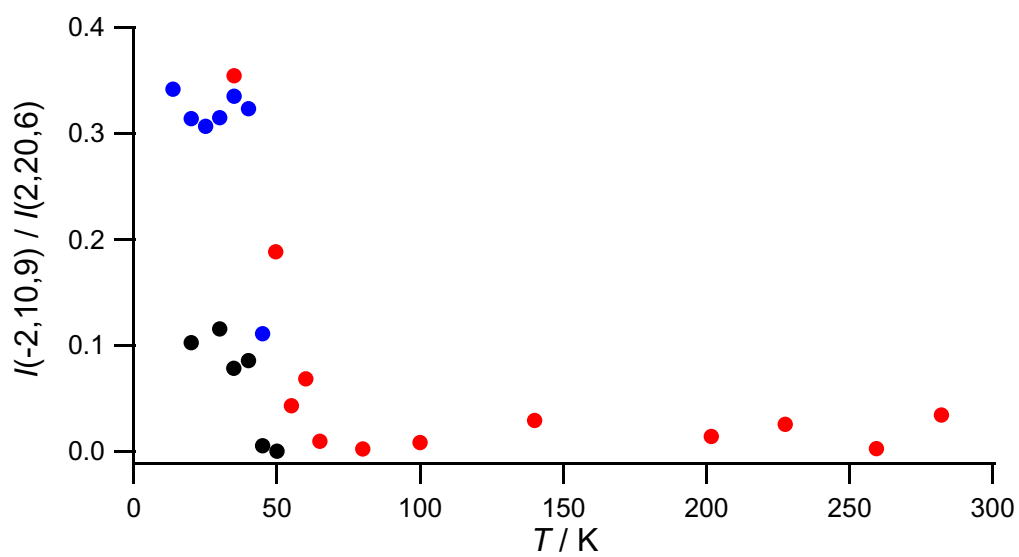

Fig. S1 T. Naito et al.

The temperature dependence of the intensity ratio between the fundamental and superlattice spots;  $I(-2, 10, 9) / I(2,20,6)$ .

The black, blue and red points mean a heating process, a cooling process and another heating process, respectively.
